# Supplementary material for: Density functional investigation and some optical experiments on dye-sensitized quantum dots
Source: Royal Society of Chemistry journal article supplement (doi:10.1039/c5cp03816b), 2015-01-01
Supplement: c5cp03816b1.pdf [file c5cp03816b1.pdf]

**Table S1** Percentage contribution of atoms to the energy levels of passivated QDs in vacuum.

| model QDs | molecular orbitals | composition in terms of most important atomic orbitals                                                                                                                           |                                                                                                                                                                                  |
|-----------|--------------------|----------------------------------------------------------------------------------------------------------------------------------------------------------------------------------|----------------------------------------------------------------------------------------------------------------------------------------------------------------------------------|
| QD1       | HOMO-5             | + 12.2% 6PX(S10) <b>3</b> + 8.6% 6PY(S7) <b>3</b> - 7.2% 6PZ(S11) <b>3</b> + 5.5% 7PX(S10) <b>3</b> - 5.2% 6PX(S7) <b>3</b> - 4.6% 6PY(S6) <b>3</b>                              |                                                                                                                                                                                  |
|           | HOMO-4             | + 8.8% 6PX(S9) <b>3</b> - 6.2% 6PY(S3) <b>3</b> - 6.1% 6PZ(S6) <b>3</b> + 5.9% 6PX(S4) <b>3</b> + 4.6% 6PZ(S3) <b>3</b> + 4.6% 6PY(S6) <b>3</b>                                  |                                                                                                                                                                                  |
|           | HOMO-3             | + 15.0% 6PZ(S8) <b>3</b> + 9.3% 6PY(S8) <b>3</b> + 6.4% 7PZ(S8) <b>3</b> + 5.7% 6PZ(S3) <b>3</b> - 5.1% 6PZ(S2) <b>3</b> + 4.6% 6PZ(S1) <b>4</b>                                 |                                                                                                                                                                                  |
|           | HOMO-2             | + 10.0% 6PY(S1) <b>4</b> - 6.8% 6PX(S1) <b>4</b> - 5.0% 6PX(S10) <b>3</b> + 4.5% 6PY(S3) <b>3</b> + 4.2% 7PY(S1) <b>4</b> - 3.9% 6PZ(S1) <b>4</b>                                |                                                                                                                                                                                  |
|           | HOMO-1             | + 12.8% 6PX(S13) <b>3</b> - 7.6% 6PZ(S2) <b>3</b> + 7.2% 6PX(S1) <b>4</b> + 6.0% 7PX(S13) <b>3</b> - 4.8% 6PZ(S1) <b>4</b> + 4.8% 6PY(S13) <b>3</b>                              |                                                                                                                                                                                  |
|           | HOMO               | + 13.4% 6PZ(S2) <b>3</b> + 8.2% 6PY(S2) <b>3</b> + 7.7% 6PX(S13) <b>3</b> + 6.1% 7PZ(S2) <b>3</b> + 6.0% 6PY(S1) <b>4</b> + 4.2% 6PZ(S1) <b>4</b>                                |                                                                                                                                                                                  |
|           | LUMO               | + 6.5% 6S(Cd24) <b>3</b> + 6.4% 6S(Cd29) <b>3</b> + 6.3% 6S(Cd27) <b>3</b> + 6.2% 6S(Cd15) <b>3</b> + 4.1% 6S(Cd21) <b>3</b> + 4.0% 6S(Cd16) <b>3</b>                            |                                                                                                                                                                                  |
|           | LUMO+1             | + 13.5% 6S(Cd27) <b>3</b> - 13.2% 6S(Cd15) <b>3</b> - 11.1% 6S(Cd29) <b>3</b> + 9.3% 6S(Cd24) <b>3</b> + 4.0% 6S(Cd17) <b>3</b> + 3.2% 5S(Cd27) <b>3</b>                         |                                                                                                                                                                                  |
|           | LUMO+2             | + 12.3% 6S(Cd16) <b>3</b> - 8.4% 6S(Cd24) <b>3</b> + 8.1% 6S(Cd21) <b>3</b> - 5.4% 6S(Cd29) <b>3</b> + 4.0% 6S(Cd28) <b>3</b> - 2.6% 6S(Cd20) <b>3</b>                           |                                                                                                                                                                                  |
|           | LUMO+3             | + 17.1% 6S(Cd21) <b>3</b> - 12.1% 6S(Cd16) <b>3</b> - 5.7% 6S(Cd25) <b>3</b> + 5.0% 6S(Cd23) <b>3</b> - 4.8% 6S(Cd19) <b>3</b> + 4.0% 5S(Cd21) <b>3</b>                          |                                                                                                                                                                                  |
|           | LUMO+4             | + 11.6% 6S(Cd29) <b>3</b> - 8.2% 6S(Cd24) <b>3</b> + 7.1% 6S(Cd27) <b>3</b> - 6.5% 6S(Cd15) <b>3</b> - 3.5% 6S(Cd16) <b>3</b> + 3.3% 5S(Cd29) <b>3</b>                           |                                                                                                                                                                                  |
|           | LUMO+5             | + 9.9% 6S(Cd15) <b>3</b> - 9.5% 6S(Cd14) <b>3</b> + 8.8% 6S(Cd27) <b>3</b> + 4.3% 11PZ(Cd27) <b>3</b> - 3.8% 5S(Cd14) <b>3</b> - 3.7% 6S(Cd24) <b>3</b>                          |                                                                                                                                                                                  |
|           | QD2                | HOMO-5                                                                                                                                                                           | + 5.9% 6PZ(S50) <b>3</b> + 5.6% 6PX(S <b>38</b> ) <b>4</b> + 3.8% 6PZ(S47) <b>3</b> - 3.6% 6PX(S32) <b>3</b> - 3.2% 6PX(S <b>31</b> ) <b>4</b> + 3.1% 6PZ(S45) <b>3</b>          |
|           |                    | HOMO-4                                                                                                                                                                           | + 5.7% 6PX(S <b>52</b> ) <b>4</b> - 5.3% 6PY(S45) <b>3</b> - 4.7% 6PY(S47) <b>3</b> + 3.6% 6PZ(S54) <b>3</b> + 3.0% 6PX(S54) <b>3</b> - 2.9% 6PX(S <b>31</b> ) <b>4</b>          |
|           |                    | HOMO-3                                                                                                                                                                           | + 5.2% 6PZ(S43) <b>3</b> + 5.0% 6PY(S32) <b>3</b> - 3.8% 6PX(S <b>38</b> ) <b>4</b> - 3.8% 6PX(S <b>52</b> ) <b>4</b> - 3.7% 6PX(S <b>31</b> ) <b>4</b> - 2.9% 6PY(S54) <b>3</b> |
| HOMO-2    |                    | + 5.1% 6PX(S <b>38</b> ) <b>4</b> + 5.1% 6PX(S <b>52</b> ) <b>4</b> + 5.1% 6PX(S <b>31</b> ) <b>4</b> + 3.0% 6PX(S30) <b>4</b> + 3.0% 6PX(S55) <b>4</b> + 2.9% 6PX(S40) <b>4</b> |                                                                                                                                                                                  |
| HOMO-1    |                    | + 14.9% 6PY(S32) <b>3</b> - 7.6% 6PZ(S43) <b>3</b> + 6.9% 7PY(S32) <b>3</b> - 5.8% 6PZ(S <b>57</b> ) <b>4</b> + 4.6% 6PY(S49) <b>4</b> - 3.5% 7PZ(S43) <b>3</b>                  |                                                                                                                                                                                  |
| HOMO      |                    | + 9.9% 6PZ(S54) <b>3</b> + 7.6% 6PZ(S43) <b>3</b> + 6.3% 6PY(S54) <b>3</b> + 4.7% 6PY(S <b>39</b> ) <b>4</b> + 4.7% 6PZ(S <b>49</b> ) <b>4</b> + 4.6% 7PZ(S54) <b>3</b>          |                                                                                                                                                                                  |
| LUMO      |                    | + 3.0% 6S(Cd17) <b>3</b> + 3.0% 6S(Cd29) <b>3</b> + 3.0% 6S(Cd12) <b>3</b> + 2.8% 6S(Cd25) <b>3</b> + 2.8% 6S(Cd58) <b>3</b> + 2.8% 6S(Cd15) <b>3</b>                            |                                                                                                                                                                                  |
| LUMO+1    |                    | + 12.1% 6S(Cd25) <b>3</b> + 7.5% 6S(Cd17) <b>3</b> + 5.0% 6S(Cd13) <b>3</b> + 4.9% 5S(Cd25) <b>3</b> - 3.4% 6S(Cd58) <b>3</b> - 3.1% 6S(Cd29) <b>3</b>                           |                                                                                                                                                                                  |
| LUMO+2    |                    | + 9.5% 6S(Cd15) <b>3</b> - 8.7% 6S(Cd58) <b>3</b> + 6.7% 6S(Cd12) <b>3</b> - 4.7% 6S(Cd19) <b>3</b> - 4.6% 6S(Cd29) <b>3</b> + 4.0% 5S(Cd15) <b>3</b>                            |                                                                                                                                                                                  |
| LUMO+3    |                    | + 8.0% 6S(Cd59) <b>3</b> + 7.9% 6S(Cd28) <b>3</b> + 7.9% 6S(Cd21) <b>3</b> - 2.3% 6S(Cd14) <b>3</b> - 2.3% 6S(Cd23) <b>3</b> - 2.3% 6S(Cd9)                                      |                                                                                                                                                                                  |
| LUMO+4    |                    | + 7.7% 6S(Cd59) <b>3</b> + 7.7% 6S(Cd28) <b>3</b> + 7.7% 6S(Cd21) <b>3</b> - 3.6% 6S(Cd58) <b>3</b> - 3.6% 6S(Cd25) <b>4</b> - 3.6% 6S(Cd15) <b>3</b>                            |                                                                                                                                                                                  |
| LUMO+5    |                    | - 6.5% 6S(Cd13) <b>3</b> + 5.9% 6S(Cd17) <b>3</b> + 5.1% 5S(Cd9) + 4.9% 6S(Cd9) - 3.8% 6S(Cd29) <b>3</b> + 3.6% 6S(Cd19) <b>3</b>                                                |                                                                                                                                                                                  |
| QD3       |                    | HOMO-5                                                                                                                                                                           | + 7.5% 6PY(S7) <b>3</b> - 6.1% 6PY(S27) <b>3</b> - 5.3% 6PX(S17) <b>3</b> + 4.0% 6PY(S2) <b>3</b> + 3.5% 7PY(S7) <b>3</b> + 3.5% 6PZ(S7) <b>3</b>                                |
|           |                    | HOMO-4                                                                                                                                                                           | + 7.2% 6PZ(S25) <b>3</b> - 6.5% 6PY(S25) <b>3</b> + 5.5% 6PZ(S6) <b>3</b> - 4.8% 6PX(S6) <b>3</b> - 4.5% 6PX(S16) <b>3</b> + 3.0% 7PZ(S25) <b>3</b>                              |
|           |                    | HOMO-3                                                                                                                                                                           | + 9.9% 6PY(S2) <b>3</b> + 6.4% 6PX(S24) <b>3</b> + 6.1% 6PZ(S24) <b>3</b> + 5.7% 6PY(S24) <b>3</b> + 4.2% 7PY(S2) <b>3</b> + 3.8% 6PZ(S2) <b>3</b>                               |
|           | HOMO-2             | + 14.3% 6PZ(S32) <b>3</b> - 12.1% 6PX(S30) <b>3</b> + 9.0% 6PZ(S30) <b>3</b> + 7.0% 7PZ(S32) <b>3</b> - 5.8% 7PX(S30) <b>3</b> + 5.6% 6PZ(S12) <b>4</b>                          |                                                                                                                                                                                  |
|           | HOMO-1             | + 12.1% 6PY(S27) <b>3</b> - 8.4% 6PX(S33) <b>3</b> - 6.5% 6PZ(S33) <b>3</b> - 6.3% 6PZ(S32) <b>3</b> + 6.2% 7PY(S27) <b>3</b> - 4.1% 7PX(S33) <b>3</b>                           |                                                                                                                                                                                  |
|           | HOMO               | + 17.3% 6PY(S27) <b>3</b> + 9.6% 6PZ(S33) <b>3</b> + 8.8% 6PX(S33) <b>3</b> + 8.6% 7PY(S27) <b>3</b> + 5.1% 6PY(S33) <b>3</b> + 4.7% 7PZ(S33) <b>3</b>                           |                                                                                                                                                                                  |
|           | LUMO               | + 5.5% 6S(Cd53) <b>3</b> + 3.3% 6S(Cd59) <b>3</b> + 2.6% 6S(Cd69) <b>3</b> + 2.6% 6S(Cd43) <b>3</b> + 2.1% 6S(Cd66) <b>4</b> + 2.0% 6S(Cd49) <b>3</b>                            |                                                                                                                                                                                  |
|           | LUMO+1             | + 11.5% 6S(Cd53) <b>3</b> - 6.6% 6S(Cd69) <b>3</b> + 5.0% 6S(Cd59) <b>3</b> + 4.0% 6S(Cd78) <b>3</b> + 3.8% 5S(Cd53) <b>3</b> - 3.1% 6S(Cd48) <b>3</b>                           |                                                                                                                                                                                  |
|           | LUMO+2             | + 9.2% 6S(Cd63) <b>3</b> + 8.6% 6S(Cd49) <b>3</b> + 5.6% 6S(Cd72) <b>3</b> + 5.3% 6S(Cd77) <b>3</b> + 3.1% 5S(Cd63) <b>3</b> + 2.8% 5S(Cd49) <b>3</b>                            |                                                                                                                                                                                  |
|           | LUMO+3             | - 7.5% 6S(Cd65) <b>3</b> + 7.4% 6S(Cd69) <b>3</b> - 6.9% 6S(Cd52) <b>3</b> - 4.8% 6S(Cd40) <b>3</b> + 4.2% 6S(Cd62) <b>3</b> + 3.7% 6S(Cd36) <b>3</b>                            |                                                                                                                                                                                  |
|           | LUMO+4             | + 10.9% 6S(Cd53) <b>3</b> - 7.7% 6S(Cd59) <b>3</b> + 5.3% 6S(Cd69) <b>3</b> + 5.2% 6S(Cd70) <b>3</b> - 5.2% 6S(Cd67) <b>3</b> + 2.8% 11PZ(Cd53) <b>3</b>                         |                                                                                                                                                                                  |
|           | LUMO+5             | + 18.7% 6S(Cd78) <b>3</b> + 7.2% 5S(Cd78) <b>3</b> - 5.6% 6S(Cd43) <b>3</b> - 4.9% 6S(Cd70) <b>3</b> + 3.4% 6S(Cd69) <b>3</b> + 3.1% 6S(Cd65) <b>3</b>                           |                                                                                                                                                                                  |

Bold letters are used for the surface 4-coordinated S-atoms near the 6 acetates in the case of QD2.

**Table S2** Optical data for theoretical absorption spectra with diffuse basis 6-311++G(d,p) for dye-QD1.

| system                          | excited states (@S <sub>0</sub> ) | excitation energy E(eV)         | wavelength (nm) | oscillator strength | eigenvalue (NTO) |
|---------------------------------|-----------------------------------|---------------------------------|-----------------|---------------------|------------------|
| vacuum                          | S <sub>0</sub> → S <sub>3</sub>   | 3.21                            | 386.66          | 0.2387              | 0.9032           |
|                                 | S <sub>0</sub> → S <sub>4</sub>   | 3.23                            | 384.02          | 0.2362              | 0.8755           |
|                                 | S <sub>0</sub> → S <sub>5</sub>   | 3.27                            | 379.01          | 0.1012              | 0.9444           |
|                                 | S <sub>0</sub> → S <sub>6</sub>   | 3.30                            | 376.26          | 0.3926              | 0.8360           |
|                                 | chloroform                        | S <sub>0</sub> → S <sub>1</sub> | 3.06            | 405.13              | 0.3914           |
| S <sub>0</sub> → S <sub>2</sub> |                                   | 3.11                            | 398.76          | 0.1827              | 0.9596           |
| S <sub>0</sub> → S <sub>3</sub> |                                   | 3.16                            | 392.79          | 0.3297              | 0.9465           |
| S <sub>0</sub> → S <sub>4</sub> |                                   | 3.17                            | 391.37          | 0.3994              | 0.7675           |
| S <sub>0</sub> → S <sub>5</sub> |                                   | 3.18                            | 389.54          | 0.1697              | 0.9826           |
| toluene                         | S <sub>0</sub> → S <sub>2</sub>   | 3.12                            | 397.30          | 0.2301              | 0.9035           |
|                                 | S <sub>0</sub> → S <sub>3</sub>   | 3.17                            | 394.04          | 0.6532              | 0.7386           |
|                                 | S <sub>0</sub> → S <sub>4</sub>   | 3.16                            | 391.79          | 0.2728              | 0.6195           |
|                                 | S <sub>0</sub> → S <sub>5</sub>   | 3.20                            | 388.80          | 0.2892              | 0.9612           |

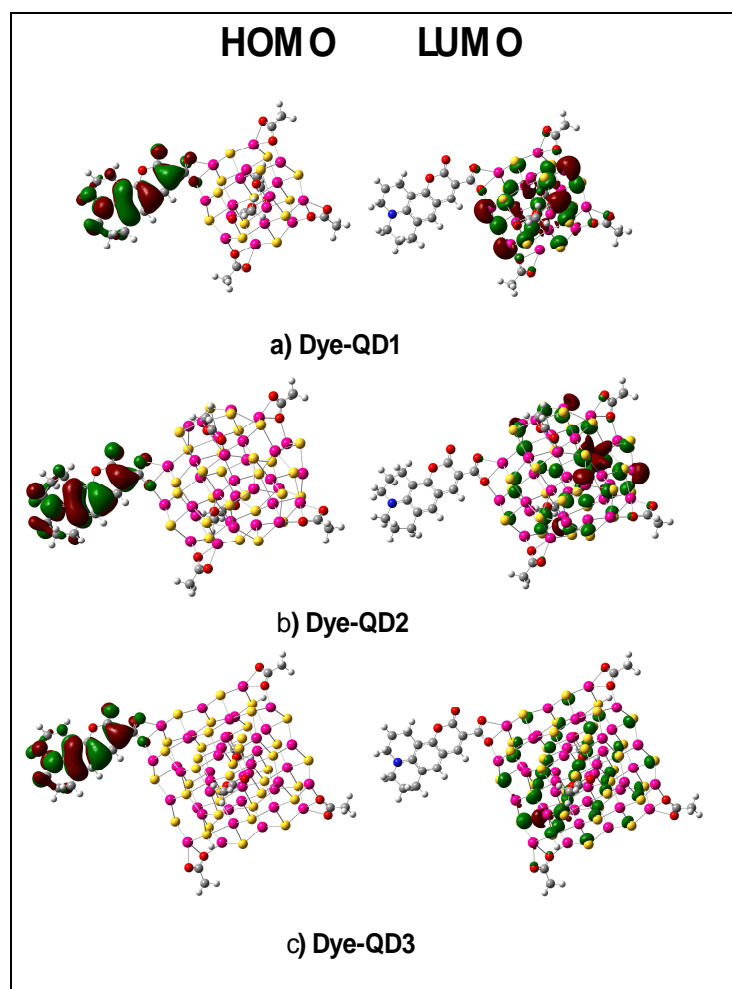

**Fig. S1** Molecular orbitals in dye-sensitized QDs in vacuum.

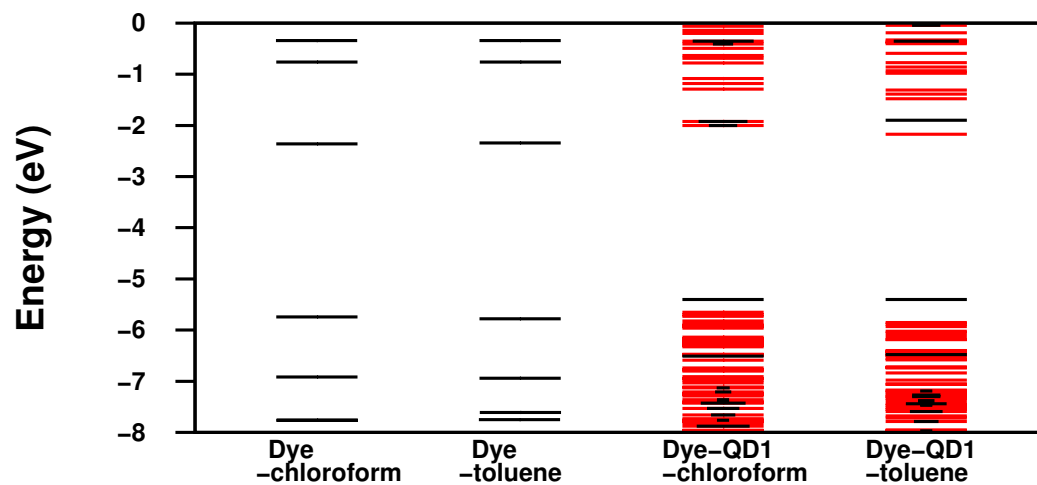

**Fig. S2** Energy levels for the model dye sensitized QDs in solvents. The black lines in the dye-QD system refer to the levels arising from the dye and their width refers to the percentage contribution of the dye.

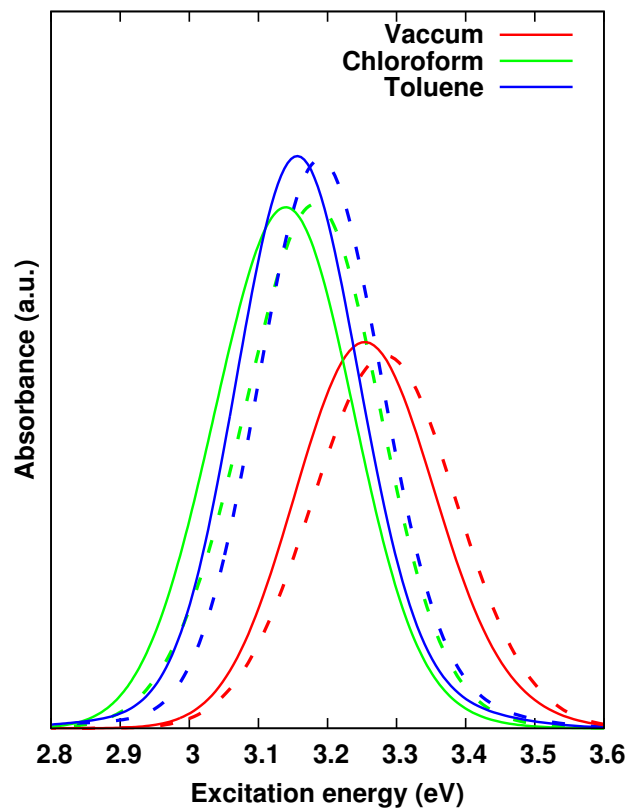

**Fig. S3** Optical absorption spectra showing the comparative results for diffuse basis set(6-311++G(d,p)) for dye-QD1. Dotted line refers to the spectra without diffuse basis set.

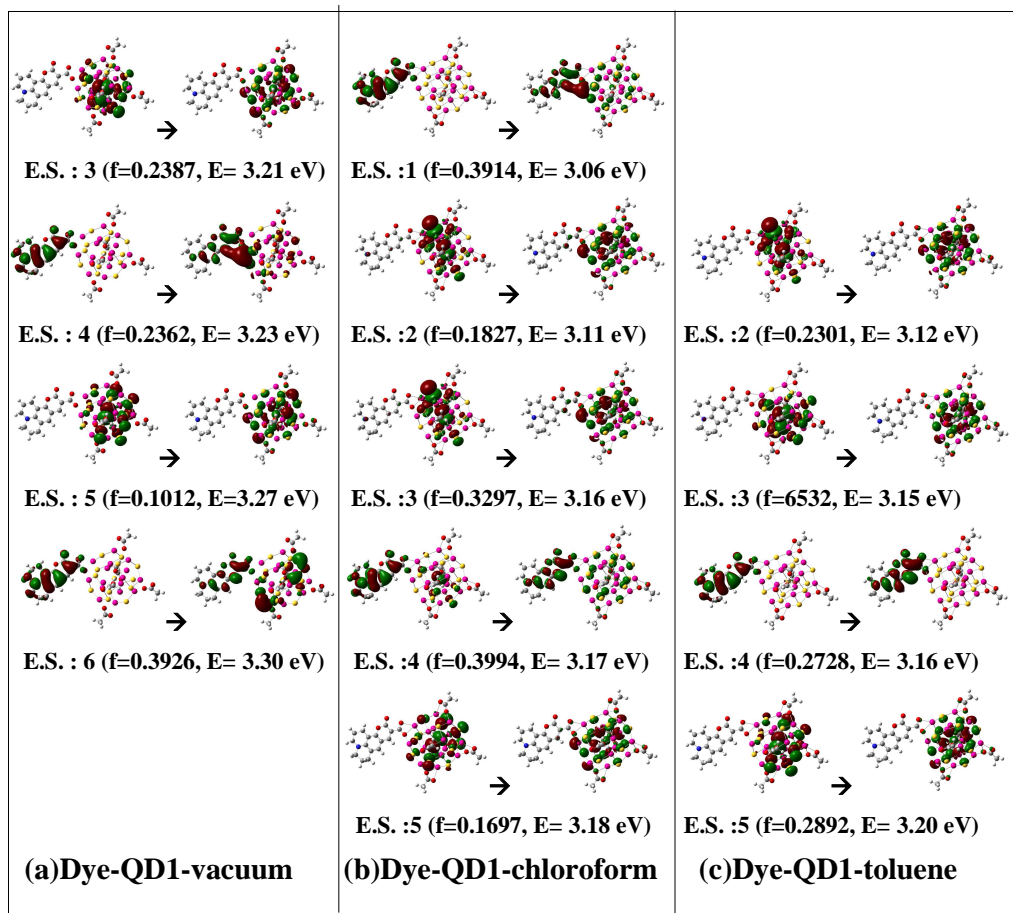

**Fig. S4** The dominant natural transition orbital pairs for the excited states of absorption with diffuse basis set(6-311++G(d,p)).
